# Supplementary material
Source: ML conference proceedings conference paper supplement (https://aclanthology.org/2022.findings-acl.220)

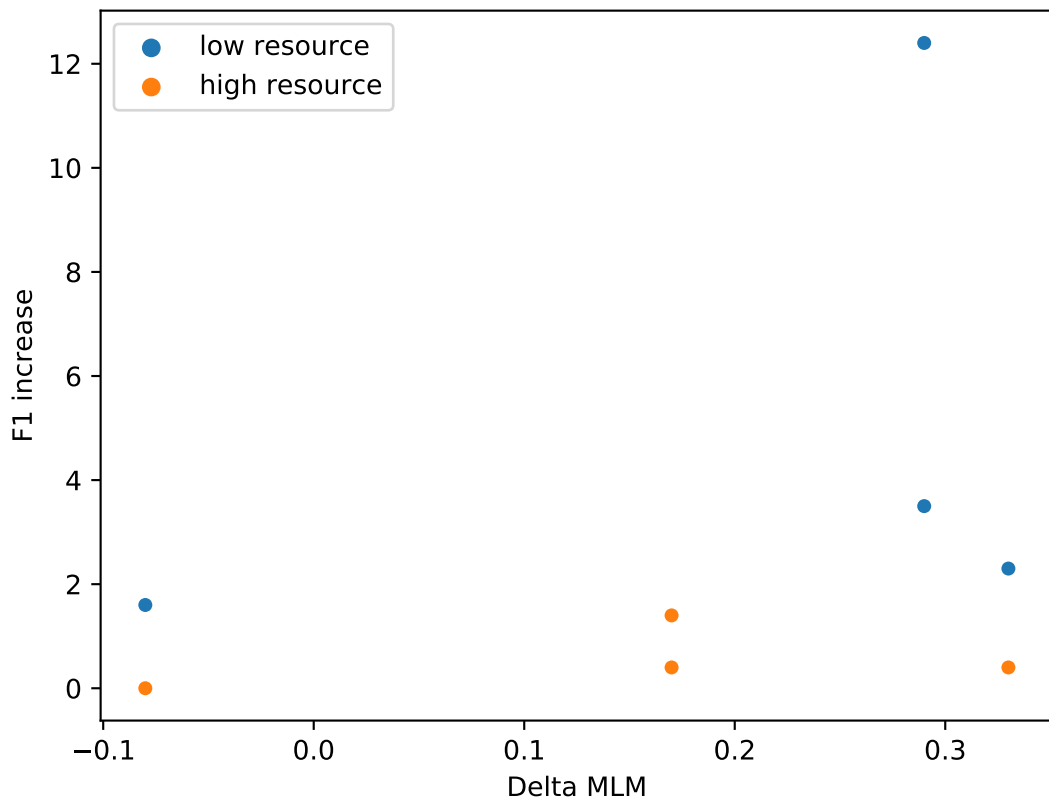

Supplement: software [file scatter.pdf › ELLE_code/downstream/scatter.pdf]
